# Supplementary material for: The quantitative trait gene latexin influences the size of the hematopoietic stem cell population in mice
Source: Springer Nature journal article supplement (doi:10.1038/ng1938), 2007-01-14
Supplement: ng1938-S1.pdf [file ng1938-S1.pdf]

**Supplementary Table 1. CAFC day 35 numbers in B6, D2 and BXD recombinant inbred strains.**

| Strain | CAFC day35 number per femur |  | Strain | CAFC day35 number per femur |
|--------|-----------------------------|--|--------|-----------------------------|
| B6     | 346.5                       |  | D2     | 553                         |
| BXD1   | 260                         |  | BXD2   | 831                         |
| BXD5   | 618                         |  | BXD6   | 292                         |
| BXD8   | 373                         |  | BXD9   | 724                         |
| BXD11  | 921                         |  | BXD12  | 555                         |
| BXD13  | 195                         |  | BXD14  | 510                         |
| BXD15  | 359                         |  | BXD16  | 545                         |
| BXD18  | 461                         |  | BXD19  | 449                         |
| BXD20  | 371                         |  | BXD21  | 515                         |
| BXD22  | 515                         |  | BXD23  | 287                         |
| BXD24  | 335                         |  | BXD25  | 249                         |
| BXD27  | 320                         |  | BXD28  | 597                         |
| BXD29  | 144                         |  | BXD30  | 478                         |
| BXD31  | 554                         |  | BXD32  | 468                         |

The absolute HSC numbers (means) represented by CAFC day35 numbers per femur in B6, D2 and 26 BXD recombinant inbred strains were derived from previously published data<sup>6,12</sup>. The linkage analysis based on these numbers was performed to search for QTL that are associated with the natural variation of HSC numbers between B6 and D2 mice.
