# Supplementary material for: The quantitative trait gene latexin influences the size of the hematopoietic stem cell population in mice
Source: Springer Nature journal article supplement (doi:10.1038/ng1938), 2007-01-14
Supplement: ng1938-S4.pdf [file ng1938-S4.pdf]

## Supplementary Table 4. Genes differentially expressed in LSK cells between D.B Chr3 and D2 strains.

Genes upregulated in D.B Chr3 LSK cells are in black, and down-regulated are in red

| Probe Set ID | Gene Title                                                  | Gene Symbol   | Chromosomal Location | Entrez Gene |
|--------------|-------------------------------------------------------------|---------------|----------------------|-------------|
| 100986_at    | four and a half LIM domains 2                               | Fhl2          | 1 C1.1               | 14200       |
| 101209_at    | Fc receptor, IgE, high affinity I, alpha polypeptide        | Fcer1a        | 1 H3 1 94.2 cM       | 14125       |
| 103761_at    | transcription factor CP2-like 1                             | Tcfcp2l1      | 1 E2                 | 81879       |
| 92440_at     | interferon regulatory factor 6                              | Irf6          | 1 H6                 | 54139       |
| 94480_at     | DNA segment, Chr 1, ERATO Doi 161, expressed                | D1Ertd161e    | 1 C4 1 41.0 cM       | 52231       |
| 102260_at    | growth factor independent 1B                                | Gfi1b         | 2 A3                 | 14582       |
| 103257_at    | RIKEN cDNA 4930577M16 gene                                  | 4930577M16Rik | 3 G1                 | 99887       |
| 160150_f_at  | calponin 3, acidic                                          | Cnn3          | 3 G1                 | 71994       |
| 160335_at    | glutamate-cysteine ligase , modifier subunit                | Gclm          | 3 H1-3 3 53.5 cM     | 14630       |
| 92581_at     | acetyl-Coenzyme A dehydrogenase, medium chain               | Acadm         | 3 H3 3 73.6 cM       | 11364       |
| 92694_at     | chitinase 3-like 3                                          | Chi3l3        | 3 F2.2 3 50.5 cM     | 12655       |
| 93491_f_at   | ubiquitin-conjugating enzyme E2D 3 (UBC4/5 homolog, yeast)  | Ube2d3        | 3 G3                 | 66105       |
| 96065_at     | latexin                                                     | Lxn           | 3 E1 3 31.6 cM       | 17035       |
| 98600_at     | S100 calcium binding protein A11 (calizzarin)               | S100a11       | 3 E-F                | 20195       |
| 99097_at     | eukaryotic translation initiation factor 4E                 | Eif4e         | 3 H1 12 25.0 cM      | 13684       |
| 102368_at    | RIKEN cDNA 2610208E05 gene                                  | 2610208E05Rik | 4 A5                 | 108755      |
| 104413_at    | EST                                                         | EST           | 4 102Mb              | AI834976    |
| 97921_at     | agrin                                                       | Agrn          | 4 E2 4 80.0 cM       | 11603       |
| 93973_at     | eukaryotic translation initiation factor 3, subunit 9 (eta) | Eif3s9        | 5 G2 5 82.0 cM       | 27979       |
| 94559_at     | general transcription factor III A                          | Gtf3a         | 5 145Mb              | 66596       |
| 95521_s_at   | zinc finger protein 68                                      | Zfp68         | 5 G2                 | 24135       |
| 96948_at     | quininoid dihydropteridine reductase                        | Qdpr          | 5 B3 5 30.0 cM       | 110391      |
| 162381_f_at  | Sphingosine kinase 2                                        | Sphk2         | 7 B2                 | 56632       |
| 94338_g_at   | growth arrest specific 2                                    | Gas2          | 7 B3 7 26.8 cM       | 14453       |
| 97352_f_at   | cytochrome c oxidase subunit VIb polypeptide 2              | Cox6b2        | 7 3.9Mb              | 333182      |
| 100441_s_at  | ankyrin 1, erythroid                                        | Ank1          | 8 A2 8 9.5 cM        | 11733       |
| 93529_at     | DNA segment, Chr 8, Wayne State University 49, expressed    | D8Wsu49e      | 8 C4 8 39.0 cM       | 71927       |
| 94286_at     | RIKEN cDNA 9130011J15 gene                                  | 9130011J15Rik | 8 B3.3               | 66818       |
| 94464_at     | chloride channel 3                                          | Clcn3         | 8 B3.1 8 32.2 cM     | 12725       |

|             |                                                                 |                 |                   |                 |
|-------------|-----------------------------------------------------------------|-----------------|-------------------|-----------------|
| 95543_at    | tropomyosin 4                                                   | Tpm4            | 8 B3.3            | 326618          |
| 102053_at   | phospholipid scramblase 2                                       | Plscr2          | 9 E3.3            | 18828           |
| 102718_at   | chemokine (C-C motif) receptor 5                                | Ccr5            | 9 72.0 cM         | 12774           |
| 104389_at   | RIKEN cDNA 1700017B05 gene                                      | 1700017B05Rik   | 9 C               | 74211           |
| 93498_s_at  | amyloid beta (A4) precursor-like protein 2                      | Aplp2           | 9 A2-B 9 13.0 cM  | 11804           |
| 96085_at    | glutathione S-transferase, alpha 4                              | Gsta4           | 9 E1              | 14860           |
| 160064_at   | syntaxin 7                                                      | Stx7            | 10 A3             | 53331           |
| 160642_at   | EST                                                             | EST             | 10 121Mb          | AI853079        |
| 93439_f_at  | EST                                                             | EST             | 10 108MB          | AA260005        |
| 161287_f_at | MYB binding protein (P160) 1a                                   | Mybbp1a         | 11 B4 11 40.0 cM  | 18432           |
| 94469_at    | methionine adenosyltransferase II, beta                         | Mat2b           | 11 A5             | 108645          |
| 95927_f_at  | RIKEN cDNA 2610201A13 gene                                      | 2610201A13Rik   | 30Mb              | 70434           |
| 103017_at   | transmembrane 7 superfamily member 1                            | Tm7sf1          | 13 A1 13 6.0 cM   | 83924           |
| 160795_at   | secretory carrier membrane protein 1                            | Scamp1          | 13 D1             | 107767          |
| 161126_at   | gene model 288, (NCBI)                                          | Gm288           | 14 C1             | 239083          |
| 98535_at    | catechol-O-methyltransferase                                    | Comt            | 16 A3 16 11.2 cM  | 12846           |
| 99134_at    | t-complex-associated testis expressed 3                         | Tcte3           | 17 A2 17 8.16 cM  | 21647           |
| 160391_at   | fatty acid desaturase 1                                         | Fads1           | 19 A              | 76267           |
| 94445_at    | plastin 3 (T-isoform)                                           | Pls3            | X A7.3            | 102866          |
| 160496_s_at | minichromosome maintenance deficient 3 ( <i>S. cerevisiae</i> ) | Mcm3            | 1 A3-A5           | 17215           |
| 160936_at   | translocating chain-associating membrane protein 1              | Tram1           | 1 A3              | 72265           |
| 101163_at   | recombination activating gene 2                                 | Rag2            | 2 E2 2 56.0 cM    | 19374           |
| 101896_at   | CD1d2 antigen                                                   | Cd1d2           | 3 F1 3 48.0 cM    | 12480           |
| 101897_g_at | CD1d1 antigen /// CD1d2 antigen                                 | Cd1d1 /// Cd1d2 | 3 F1 3 48.0 cM    | 12479 /// 12480 |
| 92770_at    | S100 calcium binding protein A6 (calcyclin)                     | S100a6          | 3 F1-F2 3 43.6 cM | 20200           |
| 96481_at    | expressed sequence C80638                                       | C80638          | 3 G3              | 97086           |
| 99051_at    | S100 calcium binding protein A4                                 | S100a4          | 3 F1-F2 3 43.6 cM | 20198           |
| 99494_at    | serine (or cysteine) proteinase inhibitor, clade I, member 1    | Serpini1        | 3 E3              | 20713           |
| 93614_at    | Ras-related GTP binding D                                       | Rragd           | 4 A5 4 11.4 cM    | 52187           |
| 97261_at    | DnaJ (Hsp40) homolog, subfamily A, member 1                     | Dnaja1          | 4 A5              | 15502           |
| 97536_at    | WD and tetratricopeptide repeats 1                              | Wdtdc1          | 4 D2.3            | 230796          |
| 102011_at   | RIKEN cDNA 2610507L03 gene                                      | 2610507L03Rik   | 7 B1              | 72140           |
| 102192_r_at | SA rat hypertension-associated homolog                          | Sah             | 7 F3              | 20216           |
| 95466_at    | coactosin-like 1 ( <i>Dictyostelium</i> )                       | Cotl1           | 8 E1              | 72042           |
| 96655_g_at  | WD repeat domain 48                                             | Wdr48           | 9 F4              | 67561           |
| 96802_at    | programmed cell death protein 7                                 | Pdcd7           | 9 D               | 50996           |
| 102779_at   | growth arrest and DNA-damage-inducible 45 beta                  | Gadd45b         | 10 C1 10 60.5 cM  | 17873           |
| 99475_at    | suppressor of cytokine signaling 2                              | Socs2           | 10 C2 10 52.0 cM  | 216233          |

|             |                                                                                                               |                          |                     |                  |
|-------------|---------------------------------------------------------------------------------------------------------------|--------------------------|---------------------|------------------|
| 101026_at   | pituitary tumor-transforming 1                                                                                | Pttg1                    | 11 A5               | 30939            |
| 162423_f_at | neighbor of Brca1 gene 1                                                                                      | Nbr1                     | 11 D 11 60.5 cM     | 17966            |
| 93134_at    | neuronal pentraxin 1                                                                                          | Nptx1                    | 11 E1-E2 11 75.0 cM | 18164            |
| 93403_at    | ATPase, Ca <sup>++</sup> transporting, ubiquitous                                                             | Atp2a3                   | 11 B4               | 53313            |
| 93699_at    | polymerase (DNA directed), gamma 2, accessory subunit                                                         | Polg2                    | 11 E1               | 50776            |
| 95325_at    | pleckstrin homology, Sec7 and coiled-coil domains 1                                                           | Pscd1                    | 11 E2               | 19157            |
| 96264_at    | Wdr45 like                                                                                                    | Wdr45l                   | 11 E2 11 3.4 cM     | 66840            |
| 96826_at    | Microfibrillar-associated protein 4                                                                           | Mfap4                    | 11 61Mb             | 76293            |
| 92411_at    | HS1 binding protein 3                                                                                         | Hs1bp3                   | 12 A.1              | 58240            |
| 92892_at    | vesicular membrane protein p24                                                                                | Vmp                      | 13 A3.1             | 22360            |
| 100391_at   | mitogen activated protein kinase 8                                                                            | Mapk8                    | 14 B                | 26419            |
| 102334_at   | docking protein 2                                                                                             | Dok2                     | 14 D2-D3 14 39.0 cM | 13449            |
| 98534_at    | Sin3-associated polypeptide 18                                                                                | Sap18                    | 14 C2 14 28.5 cM    | 20220            |
| 100343_f_at | tubulin, alpha 1                                                                                              | Tuba1                    | 15 F1 15 60.4 cM    | 22142            |
| 101447_at   | adenomatosis polyposis coli                                                                                   | Apc                      | 18 B1 18 15.0 cM    | 11789            |
| 103282_at   | RAS, guanyl releasing protein 2 /// similar to calcium and DAG-regulated guanine nucleotide exchange factor I | Rasgrp2 ///<br>LOC381240 | 19 6.1Mb            | 19395 /// 381240 |
| 102234_at   | RIKEN cDNA 1810037I17 gene                                                                                    | 1810037I17Rik            | X 28Mb              | 67704            |
